# Supplementary material for: Temporary Employment Is Associated with Poor Dietary Quality in Middle-Aged Workers in Korea: A Nationwide Study Based on the Korean Healthy Eating Index, 2013–2021
Source: MDPI journal article supplement (doi:10.3390/nu16101482), 2024-05-14
Supplement: s1 [file s1]

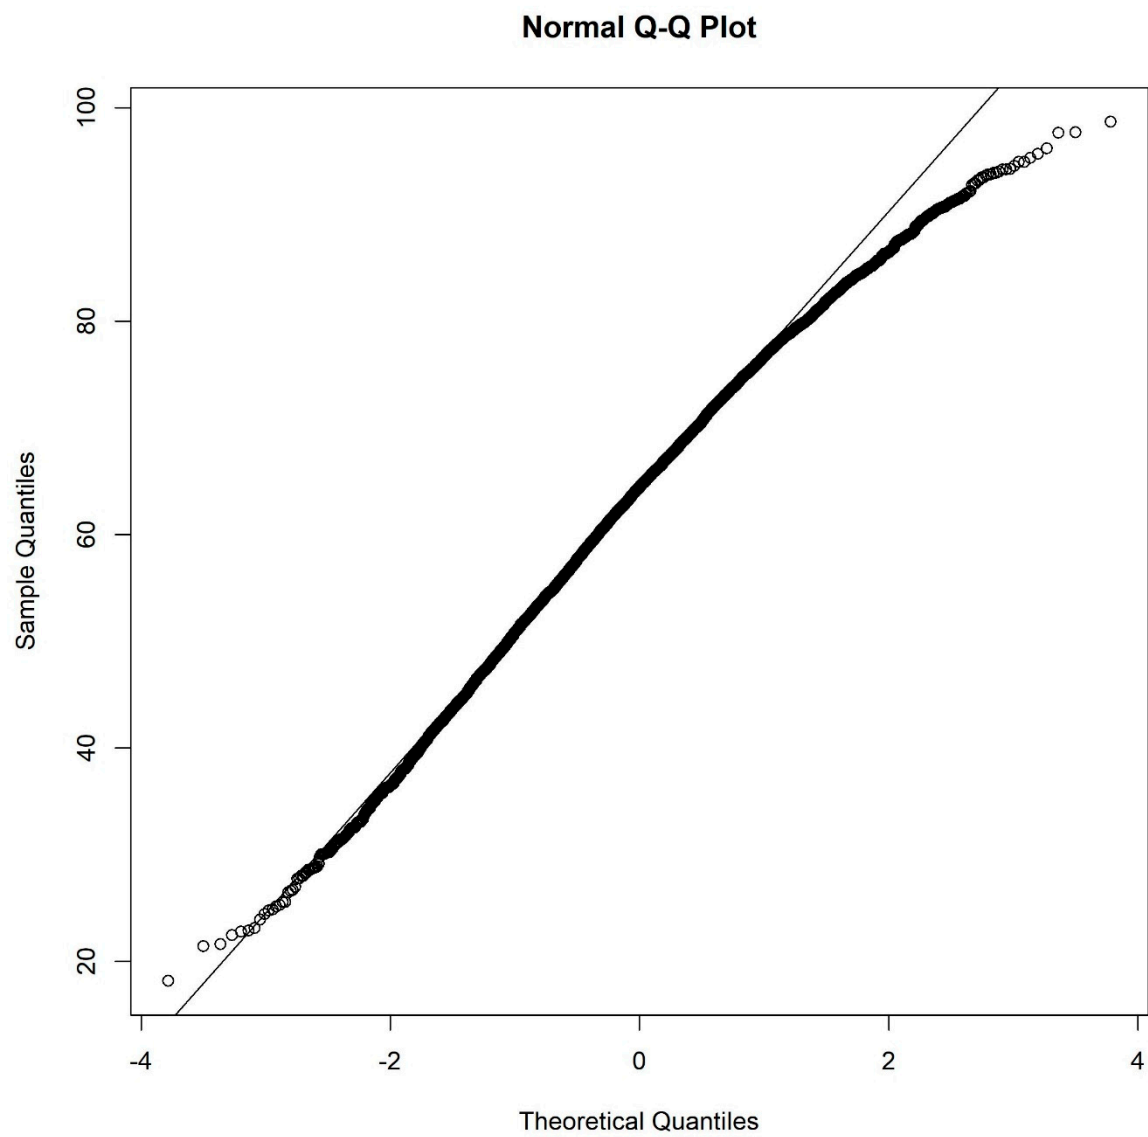

**Figure S1.** Q-Q plot of the distribution of Korean Healthy Eating Index.

## Distribution of Korean Healthy Eating Index

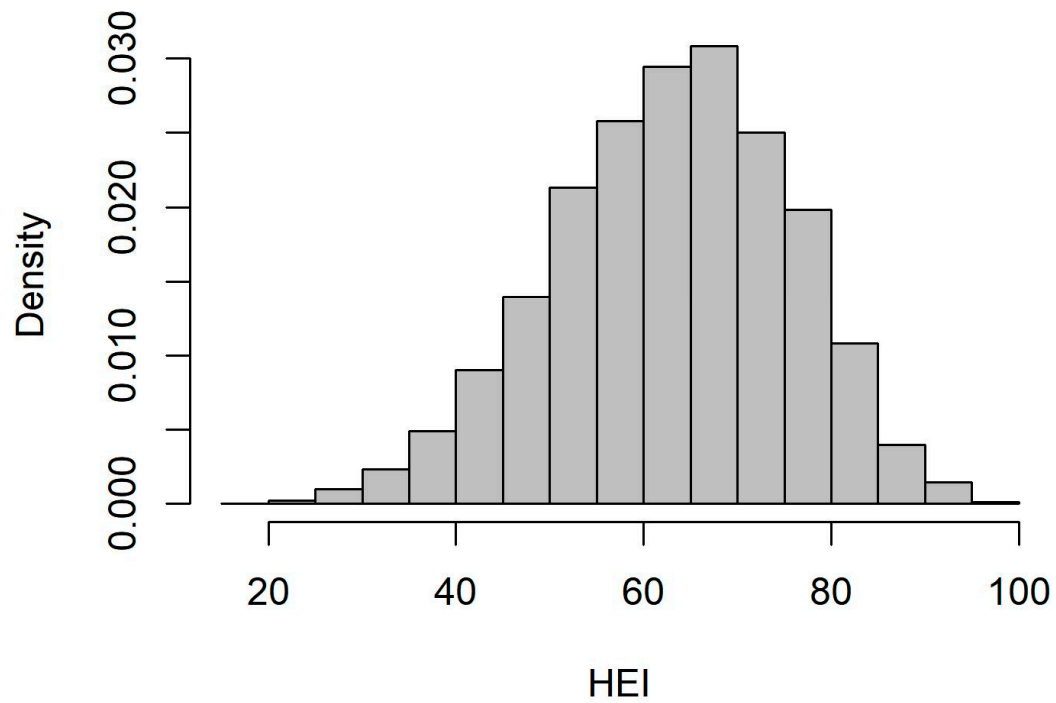

**Figure S2.** Histogram of the distribution of Korean Healthy Eating Index.

**Table S1.** Associations between temporary employment and the Korean Healthy Eating Index according to the spouse's employment status.

|                        | Men                  |                                 | Women               |                                 |
|------------------------|----------------------|---------------------------------|---------------------|---------------------------------|
|                        | Working spouse       | Non-working spouse or no spouse | Working spouse      | Non-working spouse or no spouse |
|                        | $\beta$ (95% CI)     | $\beta$ (95% CI)                | $\beta$ (95% CI)    | $\beta$ (95% CI)                |
| <b>Employment type</b> |                      |                                 |                     |                                 |
| Regular                | 0.00 (0.00, 0.00)    | 0.00 (0.00, 0.00)               | 0.00 (0.00, 0.00)   | 0.00 (0.00, 0.00)               |
| Fixed-term             | -0.38 (-3.20, 2.45)  | -5.16 (-8.38, -1.95)            | -0.72 (-2.06, 0.62) | -2.20 (-4.58, 0.19)             |
| Daily                  | -3.26 (-6.28, -0.24) | -3.40 (-6.43, -0.37)            | 0.04 (-2.10, 2.19)  | -5.80 (-9.73, -1.86)            |

$\beta$ , beta coefficient; CI, confidence interval

The adjusted model controlled for age, education, income, occupation type, working hours, and survey years.
